# Supplementary material for: Creative music therapy to promote brain structure, function, and neurobehavioral outcomes in preterm infants: a randomized controlled pilot trial protocol
Source: PubMed Central journal article supplement (PMC5613472; doi:10.1186/s40814-017-0180-5), 2017-09-26
Supplement: 40814_2017_180_MOESM3_ESM.pdf [file 40814_2017_180_MOESM3_ESM.pdf]

# Protocol

|                       |         |                     |
|-----------------------|---------|---------------------|
| Session, number:      | Date:   | Time:               |
| Video:                |         |                     |
| Position:             |         |                     |
| Incubator:            | Warmer: | Handling: Cradling: |
| Parents` integration: |         |                     |

| Before MT          | Infant                                                   | Parents/<br>Environment |
|--------------------|----------------------------------------------------------|-------------------------|
| Behavioral State   |                                                          |                         |
|                    |                                                          |                         |
| Physiological data | Heart rate:      Oxygen saturation:<br>Respiration rate: |                         |
| Other comments     |                                                          |                         |

| During MT          | Infant                                                   | Parents / Env. |
|--------------------|----------------------------------------------------------|----------------|
| Behavioral State   |                                                          |                |
|                    |                                                          |                |
| Physiological data | Heart rate:      Oxygen saturation:<br>Respiration rate: |                |
| Breathing          |                                                          |                |
| Motoric            |                                                          |                |
| Mimic/ gesture     |                                                          |                |
| Sucking            |                                                          |                |
| Vocalizing         |                                                          |                |

| After MT         | Infant                                                   | Parent / Env. |
|------------------|----------------------------------------------------------|---------------|
| Behavioral State |                                                          |               |
|                  |                                                          |               |
| Physiological d. | Heart rate:      Oxygen saturation:<br>Respiration rate: |               |
| Other comments   |                                                          |               |
